# Supplementary material for: Effect of Distress, Anxiety, and Depressive Symptoms on SARS-CoV-2 mRNA BNT162b2 Vaccine Efficacy in Cancer Patients
Source: Preprints.org preprint supplement (doi:10.20944/preprints202410.2215.v1), 2024-10-28
Supplement: Supplementary file 1 [file supplementary]

**Supplemental Figure 1.** Participant flow diagram


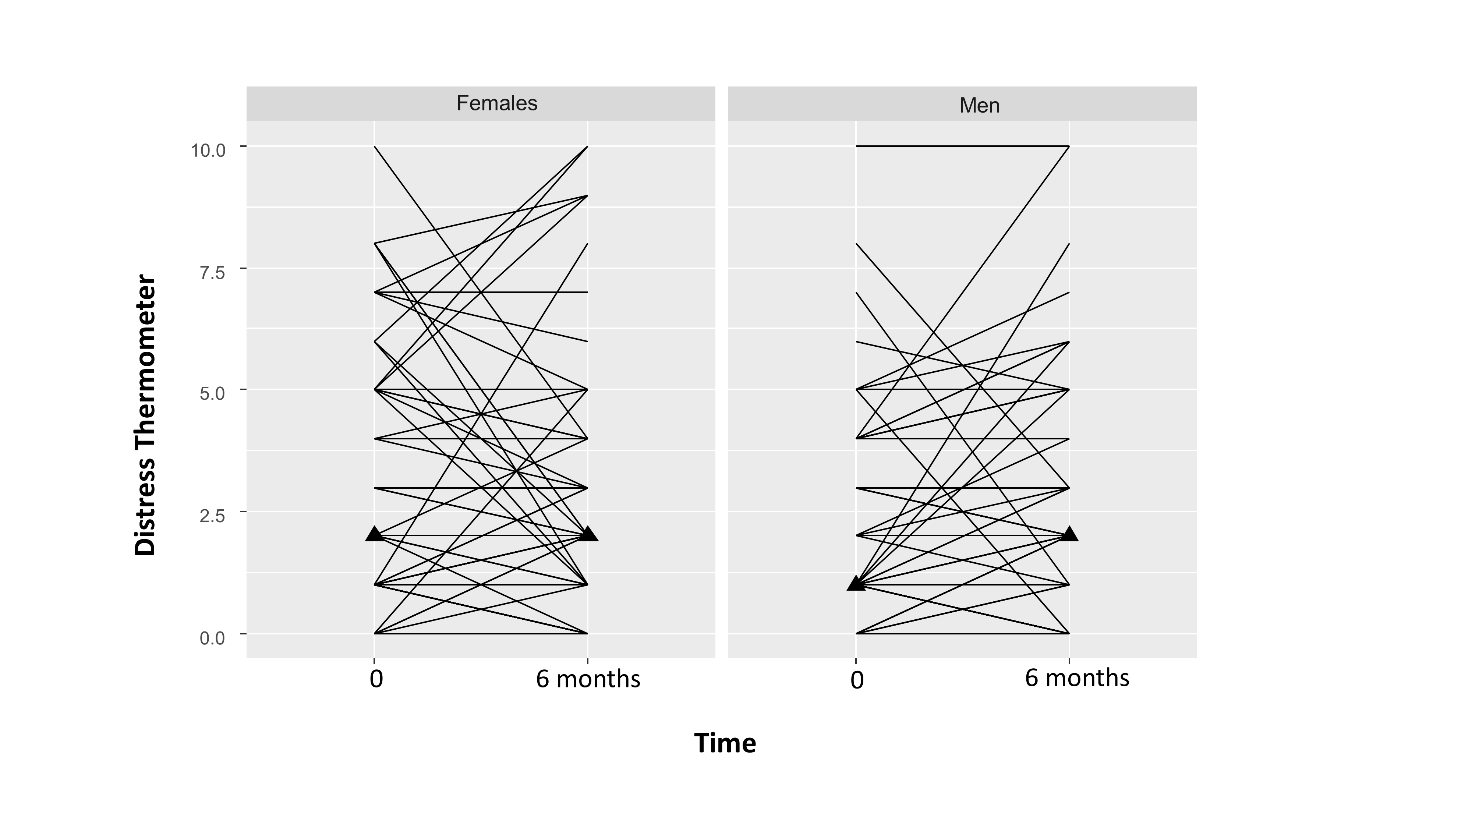


**Supplemental Figure S2.** Pre and post vaccination level of distress according to sex


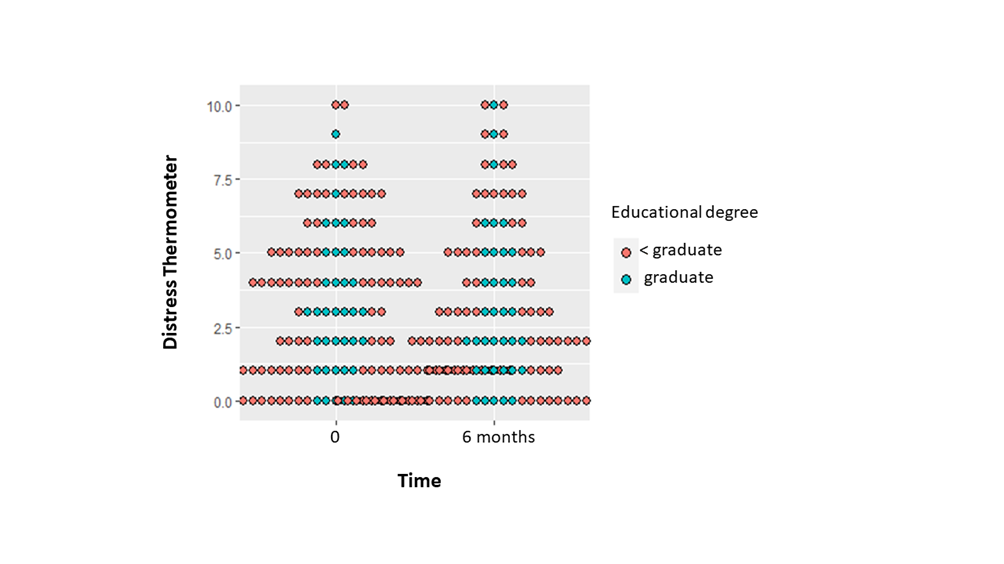


**Supplemental Figure S3.** Dotplot of repeated measure analysis of distress according to educational level

**Supplemental Table 1.** Comparison of vaccine non-responders between assay methods

|  | **Dimeric AU**  (N = 175) | **Trimeric BAU**  (N = 218) | *p value* |
| --- | --- | --- | --- |
| **Non responders** | 18 (10.2) | 31 (14.2) | 0.31 |
| **Responders** | 157 (89.8) | 187 (85.8) |

n (%)

**Supplemental Table 2.** Univariable analyses describing the association between high and low psychological symptoms and cancer sites.

|  | **High**  n (%) | **Low**  n (%) | *p value* |
| --- | --- | --- | --- |
| 80 (30.1) | 186 (69.9) |
| **Anxiety,** by Tumor site  Digestive  Lung  Breast  Genitourinary and gynecologic  Other | 7 (41.2)  17 (32.1)  10 (25.6)  46 (29.3)  46 (29.3) | 10 (58.8)  36 (67.9)  29 (74.4)  111 (70.7)  46 (29.3) | 0.68 |
| **Depressive symptoms,** by Tumor site  Digestive  Lung  Breast  Genitourinary and gynecologic  Other | 19 (32.2)  37 (35.9)  17 (26.1)  4 (21.0)  3 (15.0) | 40 (67.8)  66 (64.1)  48 (73.9)  15 (79.0)  17 (85.0) | 0.27 |
| **Distress,** by Tumor site  Digestive  Lung  Breast  Genitourinary and gynecologic  Other | 29 (31.9)  9 (32.1)  23 (35.9)  17 (23.6)  2 (18.2) | 62 (68.1)  19 (67.9)  41 (64.1)  55 (76.4)  9 (81.8) | 0.50 |
